# Supplementary material
Source: Research Square preprint supplement (doi:10.21203/rs.3.rs-9603655/v1)
Supplement: Supplementary file 1 [file f6bef66e4f27ae314554d6d0.docx]

**Supplementary file**

**Table S1 Assessment of** **age-friendly neighborhood environment**

| **Domain**  **(Score range)** | **Item** | **Mean (SD)** |
| --- | --- | --- |
| **Community facilities and for health**  **(0-6)** | Does the community have outdoor exercise facilities?  (Yes = 1; No = 0) | 2.54  (1.16) |
| Does the community have a nursing home?  (Yes = 1; No = 0) |
| Does the community have a clinic?  (Yes = 1; No = 0) |
| Does the community have a nearby pharmacy store?  (Yes = 1; No = 0) |
| Does the community have a public restroom?  (Yes = 1; No = 0) |
| Does the community have a market/convenience store/grocery?  (Yes = 1; No = 0) |
| **Outdoor spaces and buildings**  **(0-5)** | Construction structure of the community*  (Organized =1; Disorganized = 0) | 2.86  (1.21) |
| Crowdedness of the community*  (Sparse =1; Crowded = 0) |
| Degree of handicapped access of the community*  (Convenient =1; No handicapped access = 0) |
| Tidiness of the roads in the community*  (Tidy = 1; Dirty = 0) |
| Does the community have industrial pollution problem?  (Severe/moderate pollution problem = 0; Otherwise = 1) |
| **Housing****  **(0-2)** | Percentage of equipped with indoor barrier-free facilities at home in the community | 1.11  (0.39) |
| Percentage of installing elevators for the multi-floor residential buildings in the community |
| **Transportation**  **(0-3)** | Is there any bus stop within 1 km of the community?  (Yes = 1; No = 0) | 2.02  (1.11) |
| Does the community have roads accessible for cars?  (Yes = 1; No = 0) |
| What type of road does the community mainly have?  (Paved road = 1; Otherwise = 0) |
| **Facilities for social participation**  **(0-6)** | Does the community have room for card games and chess games?  (Yes = 1; No = 0) | 1.54  (1.72) |
| Does the community have organizations for helping the older adults and the handicapped?  (Yes = 1; No = 0) |
| Does the community have an activity centre for older adults?  (Yes = 1; No = 0) |
| Does the community have an older adult association?  (Yes = 1; No = 0) |
| Does the community have a dancing team or other exercise organizations?  (Yes = 1; No = 0) |
| Does the community have an association for calligraphy and painting?  (Yes = 1; No = 0) |
| **Neighbourly support****  **(0-4)** | Percentage of taking part in voluntary or charity work in the community | 0.43  (0.22) |
| Percentage of caring for the disabled or patients voluntarily in the community |
| Percentage of interacting with neighbors in the community frequently |
| Percentage of providing help for neighbors in the community frequently |
| **Government support (0-4)** | Percentage of having pension insurance in the community**++** | 2.29  (0.72) |
| Percentage of having health insurance in the community**++** |
| Does the community provide the minimum living allowance?  (Yes = 1; No = 0) |
| Does the community provide pensions for older adults aged 65 and above?  (Yes = 1; No = 0) |
| **Infrastructure for communication and information****  **(0-3)** | Percentage of having a telephone at home in the community | 1.54  (0.40) |
| Percentage of having a TV at home in the community |
| Percentage of having the internet connection at home in the community |

Notes: 1) SD = standard deviation. 2) ***** Items from interviewers’ observations from the community survey.3)****** The domain or item was calculated at the community level using the individual-level data.

**Figure S1 Flowchart of the sample selection process**

**Table S2 Variables and measurements**

| **Variables** | **Measurement** |
| --- | --- |
| ***Outcome*** |  |
| Functional abilities | The basic activities of daily living (ADL), with six activities, was used to measure the functional abilities of respondents. An aggregate score was calculated, with a higher score representing worse functional abilities. |
| Depression | The Chinese version of the Center for Epidemiologic Study Depression Scale (CES-D), with 10 short-form scale items, was used to measure the depression of respondents. The higher the score represents the more severe the depression |
| ***Independent variable*** |  |
| Multimorbidity | A discrete variable indicates the number of respondents suffering from chronic diseases. |
| ***Covariates*** |  |
| Gender | A binary variable scored as 1 for male and 2 for female |
| Age | A discrete variable indicating a respondent´s age |
| Marital status | A binary variable indicating a respondent´s marital status; 1=married, 2=others |
| Education | A categorical variable indicating a respondent´s highest level of education; 1= Primary school or illiterate, 2=High school or above |
| Occupation | A binary variable indicates the main occupational type that the respondent is currently or retired from;1=agricultural work, 2=non-agricultural work |
| Per capita household consumption expenditure | A binary variable indicates whether the per capita consumption expenditure of the respondent's household is higher than the average level of their community; 1= below the average, 2= equal to or higher than the average |
| Residency | A binary variable indicating residence area of respondents; 0=rural,1=urban |
| Supplementary medical insurance | A binary variable indicates whether the respondents have other supplementary medical insurance besides the basic medical insurance (for example, basic medical insurance for urban employees, basic medical insurance for urban and rural residents); 0=no, 1=yes |
| Smoking | A binary variable indicates whether the respondents have ever smoked; 0=no, 1=yes |
| Drinking | A binary variable indicates that respondents have consumed alcohol in the past year; 0=no, 1=yes |

**Table S3 Model fit statistics for 2-4** **trajectory groups**

| Number of trajectory groups | BIC (n=50625) | BIC (n=10125) | AIC (n=5062) |
| --- | --- | --- | --- |
| 2 | -74223.80 | -74330.05 | -74235.81 |
| 3 | -73476.70 | -73471.07 | -73445.79 |
| 4 | -74382.66 | -74361.01 | -74222.06 |

**Table S4 GBTM estimations for a three-group trajectory**

| Trajectory group | Intercept | Parameter | Standard error | T | P value |
| --- | --- | --- | --- | --- | --- |
| Traj 1 | Intercept | -120.680 | 4.278 | -50.105 | <0.001 |
| Traj 2 | Intercept | -224.817 | 3.736 | -60.165 | <0.001 |
|  | Linear term | 0.112 | 0.002 | 60.268 | <0.001 |
| Traj 3 | Intercept | -127.386 | 2.857 | -44.583 | <0.001 |
|  | Linear term | 0.063 | 0.001 | 45.027 | <0.001 |
| Group proportion (%) | | | | | |
| Traj 1 |  | 11.865 | 0.323 | 36.732 | <0.001 |
| Traj 2 |  | 57.101 | 0.673 | 84.775 | <0.001 |
| Traj 3 |  | 31.032 | 0.651 | 47.599 | <0.001 |

**Table S5 LGCM results on the impacts of covariates on ADL scores**

|  | Intercept | Slope | ADL 2011 | ADL 2013 | ADL 2015 | ADL 2018 | ADL 2020 |
| --- | --- | --- | --- | --- | --- | --- | --- |
| Coef.  (SE) | Coef.  (SE) | Coef.  (SE) | Coef.  (SE) | Coef.  (SE) | Coef.  (SE) | Coef.  (SE) |
| Gender (ref.=male) |  |  |  |  |  |  |  |
| Female | -0.177***  (0.047) | 0.018  (0.021) |  |  |  |  |  |
| Education (ref.= Primary school or illiterate) |  |  |  |  |  |  |  |
| High school or above | 0.001  (0.031) | 0.025  (0.019) |  |  |  |  |  |
| Age |  |  | -0.095***  (0.030) | 0.009***  (0.001) | 0.015***  (0.002) | 0.022***  (0.002) | 0.031***  (0.002) |
| Marital status (ref.=married) |  |  |  |  |  |  |  |
| Others |  |  | 0.008***  (0.001) | -0.007  (0.030) | 0.015  (0.046) | 0.075  (0.056) | -0.048  (0.074) |
| Occupation (ref.= agricultural work) |  |  |  |  |  |  |  |
| Non-agricultural work |  |  | -0.051***  (0.015) | 0.020  (0.029) | 0.087**  (0.030) | 0.132***  (0.032) | 0.161***  (0.044) |
| Household consumption expenditure (ref.= below the average) |  |  |  |  |  |  |  |
| Equal to or higher than the average |  |  | 0.101***  (0.024) | 0.032  (0.021) | 0.047*  (0.023) | 0.029  (0.027) | 0.016  (0.039) |
| Residency (ref.= rural) |  |  |  |  |  |  |  |
| Urban |  |  | -0.031  (0.024) | -0.016  (0.031) | -0.070  (0.036) | -0.080  (0.042) | -0.160**  (0.055) |
| Supplementary medical insurance (ref.=no) |  |  |  |  |  |  |  |
| Yes |  |  | -0.037  (0.032) | -0.026  (0.068) | 0.018  (0.039) | -0.010  (0.064) | -0.044  (0.071) |
| Smoking (ref.=no) |  |  |  |  |  |  |  |
| Yes |  |  | 0.032  (0.043) | -0.001  (0.022) | 0.082**  (0.030) | -0.010  (0.029) | 0.167**  (0.058) |
| Drinking (ref.=no) |  |  |  |  |  |  |  |
| Yes |  |  | -0.060  (0.031) | 0.019  (0.031) | -0.046  (0.043) | -0.116  (0.061) | 0.236**  (0.084) |

**Note：* p<0.05, ** p<0.01, *** p<0.001**

**Table S6 LGCM results on the impacts of covariates on CES-D scores**

|  | Intercept | Slope | CES-D 2011 | CES-D 2013 | CES-D 2015 | CES-D 2018 | CES-D 2020 |
| --- | --- | --- | --- | --- | --- | --- | --- |
| Coef.  (SE) | Coef.  (SE) | Coef.  (SE) | Coef.  (SE) | Coef.  (SE) | Coef.  (SE) | Coef.  (SE) |
| Gender (ref.=male) |  |  |  |  |  |  |  |
| Female | -1.039***  (0.218) | 0.028  (0.068) |  |  |  |  |  |
| Education (ref.= Primary school or illiterate) |  |  |  |  |  |  |  |
| High school or above | 1.000***  (0.145) | 0.400***  (0.065) |  |  |  |  |  |
| Age |  |  | 0.432***  (0.129) | -0.020***  (0.006) | -0.016**  (0.006) | -0.016  (0.006) | -0.005  (0.007) |
| Marital status (ref.=married) |  |  |  |  |  |  |  |
| Others |  |  | 0.001  (0.987) | -0.076  (0.129) | -0.470**  (0.182) | -0.777***  (0.204) | -1.225***  (0.232) |
| Occupation (ref.= agricultural work) |  |  |  |  |  |  |  |
| Non-agricultural work |  |  | -0.350***  (0.066) | -0.207  (0.127) | -0.145  (0.121) | -0.186  (0.116) | -0.401***  (0.120) |
| household consumption expenditure (ref.= below the average) |  |  |  |  |  |  |  |
| Equal to or higher than the average |  |  | -0.098  (0.107) | -0.165  (0.090) | -0.165  (0.096) | -0.055  (0.102) | -0.098  (0.107) |
| Residency (ref.= rural) |  |  |  |  |  |  |  |
| Urban |  |  | -0.210*  (0.106) | -0.230  (0.136) | -0.892***  (0.147) | -0.927***  (0.152) | -1.059***  (0.158) |
| Supplementary medical insurance (ref.=no) |  |  |  |  |  |  |  |
| Yes |  |  | -0.615***  (0.146) | -0.074  (0.292) | -0.428**  (0.162) | -0.139  (0.242) | -0.516**  (0.194) |
| Smoking (ref.=no) |  |  |  |  |  |  |  |
| Yes |  |  | -0.133  (0.193) | 0.148  (0.097) | -0.116  (0.123) | -0.012  (0.110) | -0.250  (0.159) |
| Drinking (ref.=no) |  |  |  |  |  |  |  |
| Yes |  |  | 0.229  (0.137) | -0.104  (0.127) | -0.290  (0.161) | -0.095  (0.214) | 0.058  (0.282) |

**Note：* p<0.05, ** p<0.01, *** p<0.001**
